# Supplementary material for: Resveratrol Encapsulation and Release from Pristine and Functionalized Mesoporous Silica Carriers
Source: MDPI journal article supplement (doi:10.3390/pharmaceutics14010203), 2022-01-16
Supplement: s1 [file s1]

# Supplementary Materials: Resveratrol Encapsulation and Release from Pristine and Functionalized Mesoporous Silica Carriers

Simona Ioniță, Daniel Lincu, Raul-Augustin Mitran, Laila Ziko, Nada K. Sedky, Mihaela Deaconu, Ana-Maria Brezoiu, Cristian Matei <sup>1</sup> and Daniela Berger

## Characterization of materials

### Nitrogen adsorption - desorption isotherms

Nitrogen adsorption – desorption isotherms were recorded for all samples and the corresponding pore size distribution curves were determined from corresponding isotherm (Figure S1).

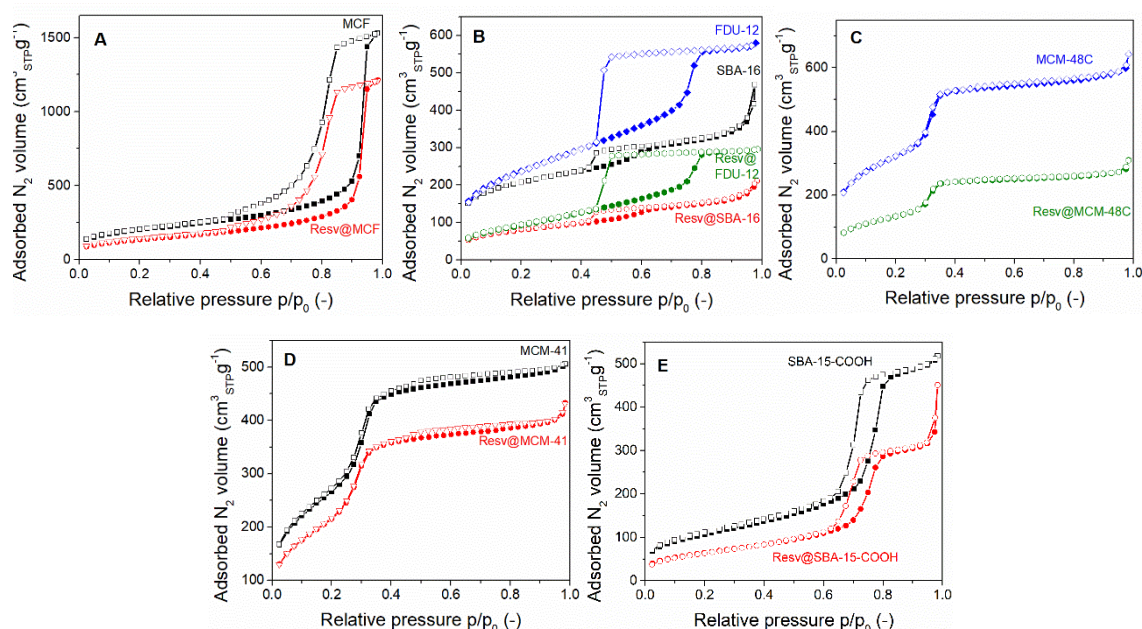

**Figure S1.** Nitrogen adsorption-desorption isotherms of mesoporous carriers and resveratrol-loaded carriers: MCF and Resv@MCF (A); FDU-12, SBA-16 and Resv@FDU-12, Resv@SBA-16 (B); MCM-48 and Resv@MCM-48 (C); MCM-41 and Resv@MCM-41 (D); SBA-15-COOH and Resv@SBA-15-COOH (E).

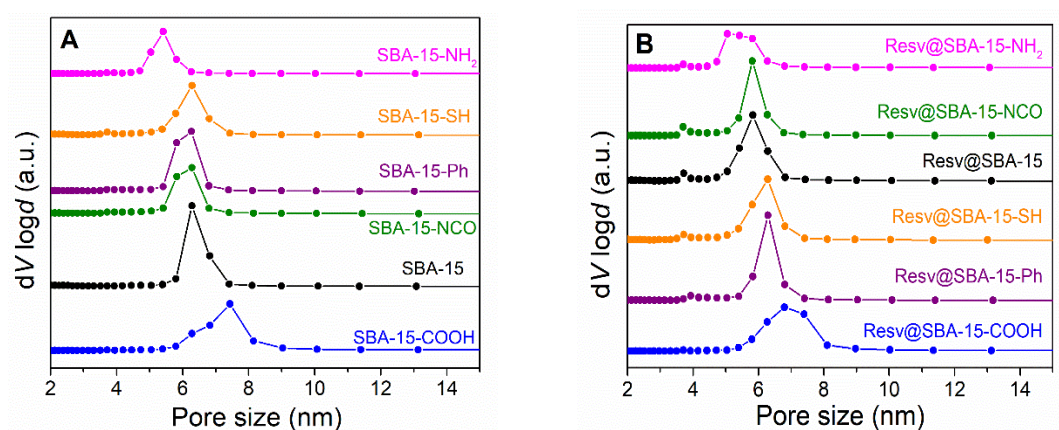

**Figure S2.** Pore size distribution curves determined from nitrogen adsorption-desorption isotherms for SBA-15-type carriers (A) and resveratrol-loaded SBA-15-type carriers (B).

### X-ray diffraction

The small-angle XRD patterns of pristine and functionalized SBA-15 carriers exhibit the characteristic (110) and (200) Bragg reflections of the *P6mm* hexagonal space group (Figure S3).

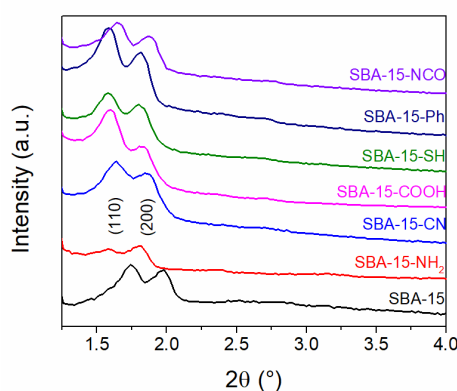

**Figure S3.** Small-angle XRD patterns of pristine and functionalized SBA-15 carriers.

### DSC analysis

The DSC traces of resveratrol-loaded functionalized SBA-15 carriers are presented in Figure S4.

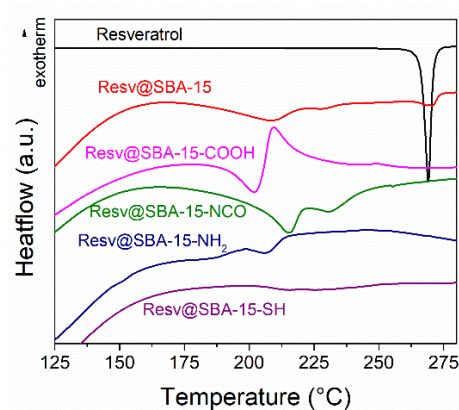

**Figure S4.** DSC traces of resveratrol – loaded samples containing functionalized carriers.

## Release profiles

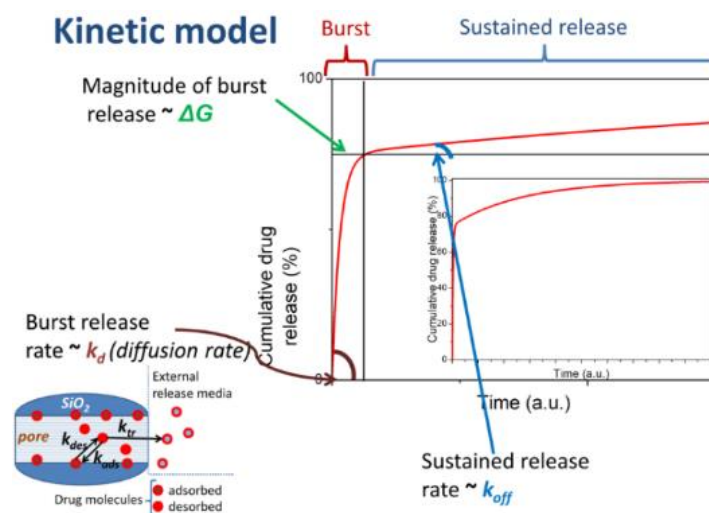

Figure S5. Representation of the three-parameter model.

## Correlation of model parameters to textural properties

Two correlation studies between the fitted parameters of the theoretical kinetics model and the physico-chemical parameters of the carriers and resveratrol-loaded samples have been performed using Microsoft Excel. The two correlation studies were carried out on the materials containing pristine mesoporous silica (MCM-41, MCM-48C, SBA-16, FDU-12, MCF, SBA-15) or on the functionalized samples, including the parent SBA-15 (SBA-15, SBA-15-COOH, SBA-15-NCO, SBA-15-NH<sub>2</sub>, SBA-15-Ph, SBA-15-SH). The correlation coefficients  $r$  take values between -1 and 1, with values close to 1 indicating direct correlation and values close to -1 indicating inverse correlation (Table S1, Table S2). The  $p$ -values were computed for each pair of model parameter – physico-chemical property.

**Table S1.** Correlation coefficients,  $r$  and  $p$ -values for the drug-loaded samples obtained using pristine silica carriers.

|            | Carriers                           |                                     |                                    |                                                |                                             |                                     |                      | Resveratrol-loaded samples                     |                                             |                                     |                      |
|------------|------------------------------------|-------------------------------------|------------------------------------|------------------------------------------------|---------------------------------------------|-------------------------------------|----------------------|------------------------------------------------|---------------------------------------------|-------------------------------------|----------------------|
|            | $\Delta H$<br>(J g <sup>-1</sup> ) | Crystalline<br>(% wt.)              | $s$<br>(% wt.)                     | $S_{BET}$<br>(m <sup>2</sup> g <sup>-1</sup> ) | $V_p$<br>(cm <sup>3</sup> g <sup>-1</sup> ) | $d_{des}$<br>(nm)                   | $d_{ads}$<br>(nm)    | $S_{BET}$<br>(m <sup>2</sup> g <sup>-1</sup> ) | $V_p$<br>(cm <sup>3</sup> g <sup>-1</sup> ) | $d_{des}$<br>(nm)                   | $d_{ads}$<br>(nm)    |
|            |                                    |                                     | Amorphous                          |                                                |                                             |                                     |                      |                                                |                                             |                                     |                      |
| $\Delta G$ | -0.75<br>(p = 0.084)               | 0.75<br>(p = 0.085)                 | -0.75<br>(p = 0.085)               | -0.15<br>(p = 0.778)                           | 0.71<br>(p = 0.114)                         | 0.65<br>(p = 0.163)                 | 0.69<br>(p = 0.129)  | 0.26<br>(p = 0.615)                            | 0.73<br>(p = 0.099)                         | 0.65<br>(p = 0.166)                 | 0.69<br>(p = 0.132)  |
| $k_{tr}$   | 0.6<br>(p = 0.205)                 | -0.62<br>(p = 0.192)                | 0.62<br>(p = 0.192)                | -0.01<br>(p = 0.983)                           | -0.38<br>(p = 0.461)                        | -0.36<br>(p = 0.489)                | -0.35<br>(p = 0.493) | -0.43<br>(p = 0.399)                           | -0.43<br>(p = 0.394)                        | -0.34<br>(p = 0.516)                | -0.34<br>(p = 0.504) |
| $k_{des}$  | 0.78<br>(p = 0.069)                | -0.78<br>(p = 0.068)                | 0.78<br>(p = 0.068)                | <b>0.91</b><br>(p = <b>0.012</b> )             | -0.7<br>(p = 0.123)                         | <b>-0.83</b><br>(p = <b>0.042</b> ) | -0.78<br>(p = 0.069) | 0.17<br>(p = 0.749)                            | -0.7<br>(p = 0.118)                         | <b>-0.82</b><br>(p = <b>0.045</b> ) | -0.77<br>(p = 0.073) |
| $k_{ads}$  | <b>0.83</b><br>(p = <b>0.039</b> ) | <b>-0.84</b><br>(p = <b>0.039</b> ) | <b>0.84</b><br>(p = <b>0.039</b> ) | 0.28<br>(p = 0.586)                            | -0.69<br>(p = 0.129)                        | -0.69<br>(p = 0.132)                | -0.69<br>(p = 0.132) | -0.25<br>(p = 0.627)                           | -0.72<br>(p = 0.108)                        | -0.67<br>(p = 0.143)                | -0.68<br>(p = 0.139) |

|                    |   |   |   |              |   |  |  |              |   |  |  |              |   |  |        |   |  |              |   |  |              |   |  |                   |  |  |    |        |
|--------------------|---|---|---|--------------|---|--|--|--------------|---|--|--|--------------|---|--|--------|---|--|--------------|---|--|--------------|---|--|-------------------|--|--|----|--------|
| <i>Crystalline</i> |   |   |   | <b>-0.52</b> |   |  |  | <b>0.85</b>  |   |  |  | <b>0.90</b>  |   |  | 0.82   |   |  | <b>0.23</b>  |   |  | <b>0.87</b>  |   |  |                   |  |  |    | 0.81   |
| <i>ne</i>          |   |   |   | ( <b>p</b>   | = |  |  | ( <b>p</b>   | = |  |  | ( <b>p</b>   | = |  | (p     | = |  | ( <b>p</b>   | = |  | ( <b>p</b>   | = |  | <b>0.88</b>       |  |  | (p | =      |
| (% wt.)            | - | - | - | <b>0.034</b> |   |  |  | <b>0.016</b> |   |  |  | <b>0.044</b> |   |  | 0.658) |   |  | <b>0.023</b> |   |  | <b>0.022</b> |   |  | <b>(p = 0.05)</b> |  |  | (p | =      |
|                    |   |   |   |              |   |  |  |              |   |  |  |              |   |  |        |   |  |              |   |  |              |   |  |                   |  |  |    | 0.085) |

**Table S2.** Correlation coefficients,  $r$  and  $p$ -values for the drug-loaded samples obtained using functionalized silica carriers.

|            |                      | Carriers                      |                                                |                                             |                      |                   | Resveratrol-loaded samples                     |                                             |                   |                   |
|------------|----------------------|-------------------------------|------------------------------------------------|---------------------------------------------|----------------------|-------------------|------------------------------------------------|---------------------------------------------|-------------------|-------------------|
|            | Resv. (%<br>wt.)     | SiO <sub>2</sub> /OG<br>(mol) | $S_{BET}$<br>(m <sup>2</sup> g <sup>-1</sup> ) | $V_p$<br>(cm <sup>3</sup> g <sup>-1</sup> ) | $d_{des}$<br>(nm)    | $d_{ads}$<br>(nm) | $S_{BET}$<br>(m <sup>2</sup> g <sup>-1</sup> ) | $V_p$<br>(cm <sup>3</sup> g <sup>-1</sup> ) | $d_{des}$<br>(nm) | $d_{ads}$<br>(nm) |
| $\Delta G$ | <b>-0.87</b>         | 0.27                          | -0.26                                          | 0.1                                         | 0.56                 | 0.41              | -0.24                                          | 0.08                                        | 0.47              | 0.53              |
|            | ( <b>p = 0.025</b> ) | (p = 0.6)                     | (p = 0.614)                                    | (p = 0.857)                                 | (p = 0.246)          | (p = 0.423)       | (p = 0.651)                                    | (p = 0.875)                                 | (p = 0.343)       | (p = 0.278)       |
| $k_{tr}$   | 0.30                 | -0.7                          | -0.43                                          | -0.72                                       | -0.74                | -0.64             | -0.66                                          | <b>-0.92</b>                                | -0.77             | -0.65             |
|            | (p = 0.568)          | (p = 0.119)                   | (p = 0.399)                                    | (p = 0.107)                                 | (p = 0.089)          | (p = 0.174)       | (p = 0.152)                                    | ( <b>p = 0.009</b> )                        | (p = 0.071)       | (p = 0.164)       |
| $k_{des}$  | -0.52                | 0.05                          | -0.63                                          | -0.22                                       | <b>0.84</b>          | 0.81              | -0.44                                          | 0.03                                        | 0.67              | 0.74              |
|            | (p = 0.289)          | (p = 0.92)                    | (p = 0.178)                                    | (p = 0.67)                                  | ( <b>p = 0.034</b> ) | (p = 0.052)       | (p = 0.388)                                    | (p = 0.958)                                 | (p = 0.144)       | (p = 0.091)       |
| $k_{ads}$  | -0.16                | -0.05                         | -0.63                                          | -0.35                                       | 0.65                 | 0.67              | -0.34                                          | 0                                           | 0.46              | 0.48              |
|            | (p = 0.757)          | (p = 0.928)                   | (p = 0.181)                                    | (p = 0.502)                                 | (p = 0.159)          | (p = 0.147)       | (p = 0.516)                                    | (p = 0.994)                                 | (p = 0.364)       | (p = 0.339)       |
